# Supplementary material for: Early-life stress impairs postnatal oligodendrogenesis and adult emotional behaviour through activity-dependent mechanisms
Source: PubMed Central journal article supplement (PMC7244403; doi:10.1038/s41380-019-0493-2), 2019-08-22
Supplement: 41380_2019_493_MOESM2_ESM.pdf [file 41380_2019_493_MOESM2_ESM.pdf]

A Biological Process Enrichment Score of 52 mapped among 56 upregulated genes

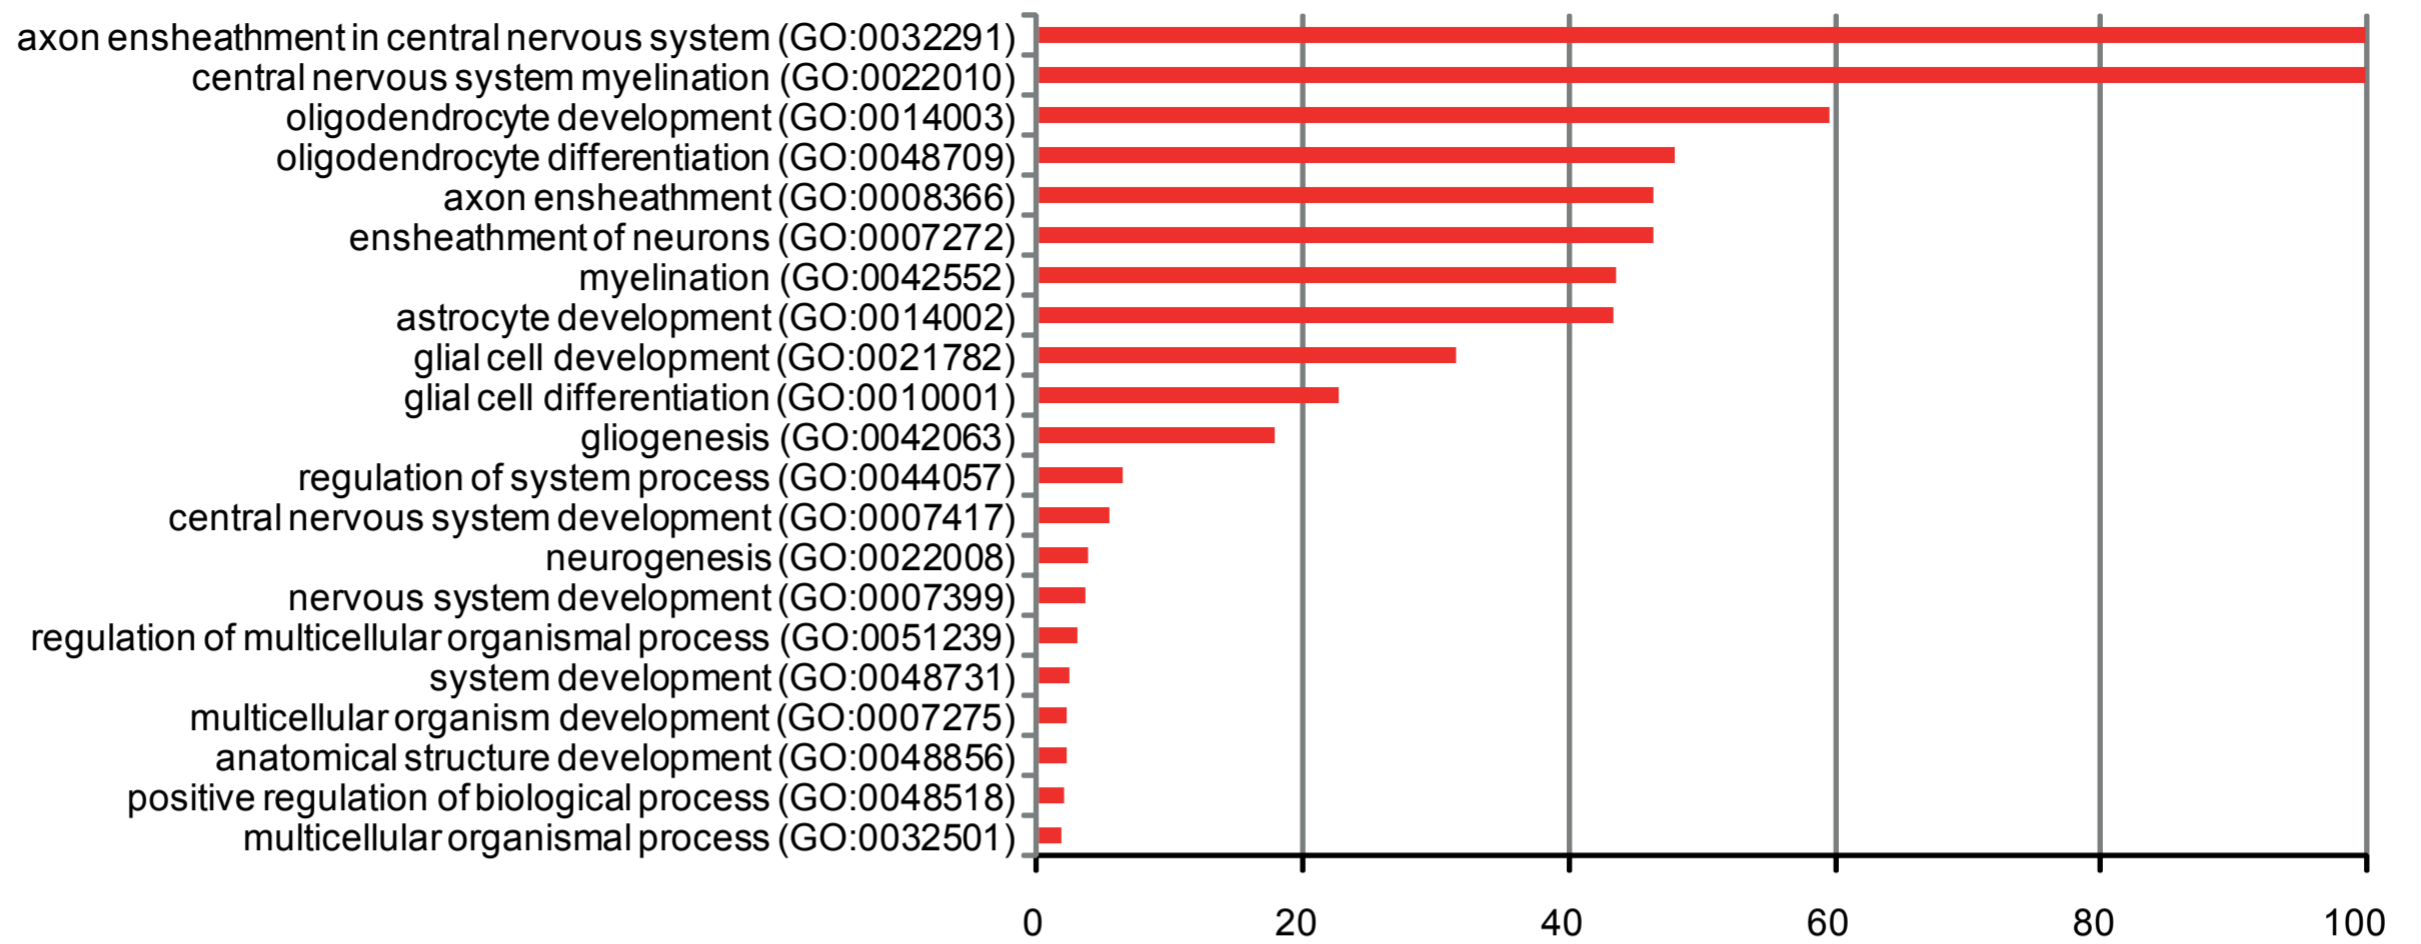

B Biological Process Enrichment Score of 16 mapped among on 28 downregulated genes

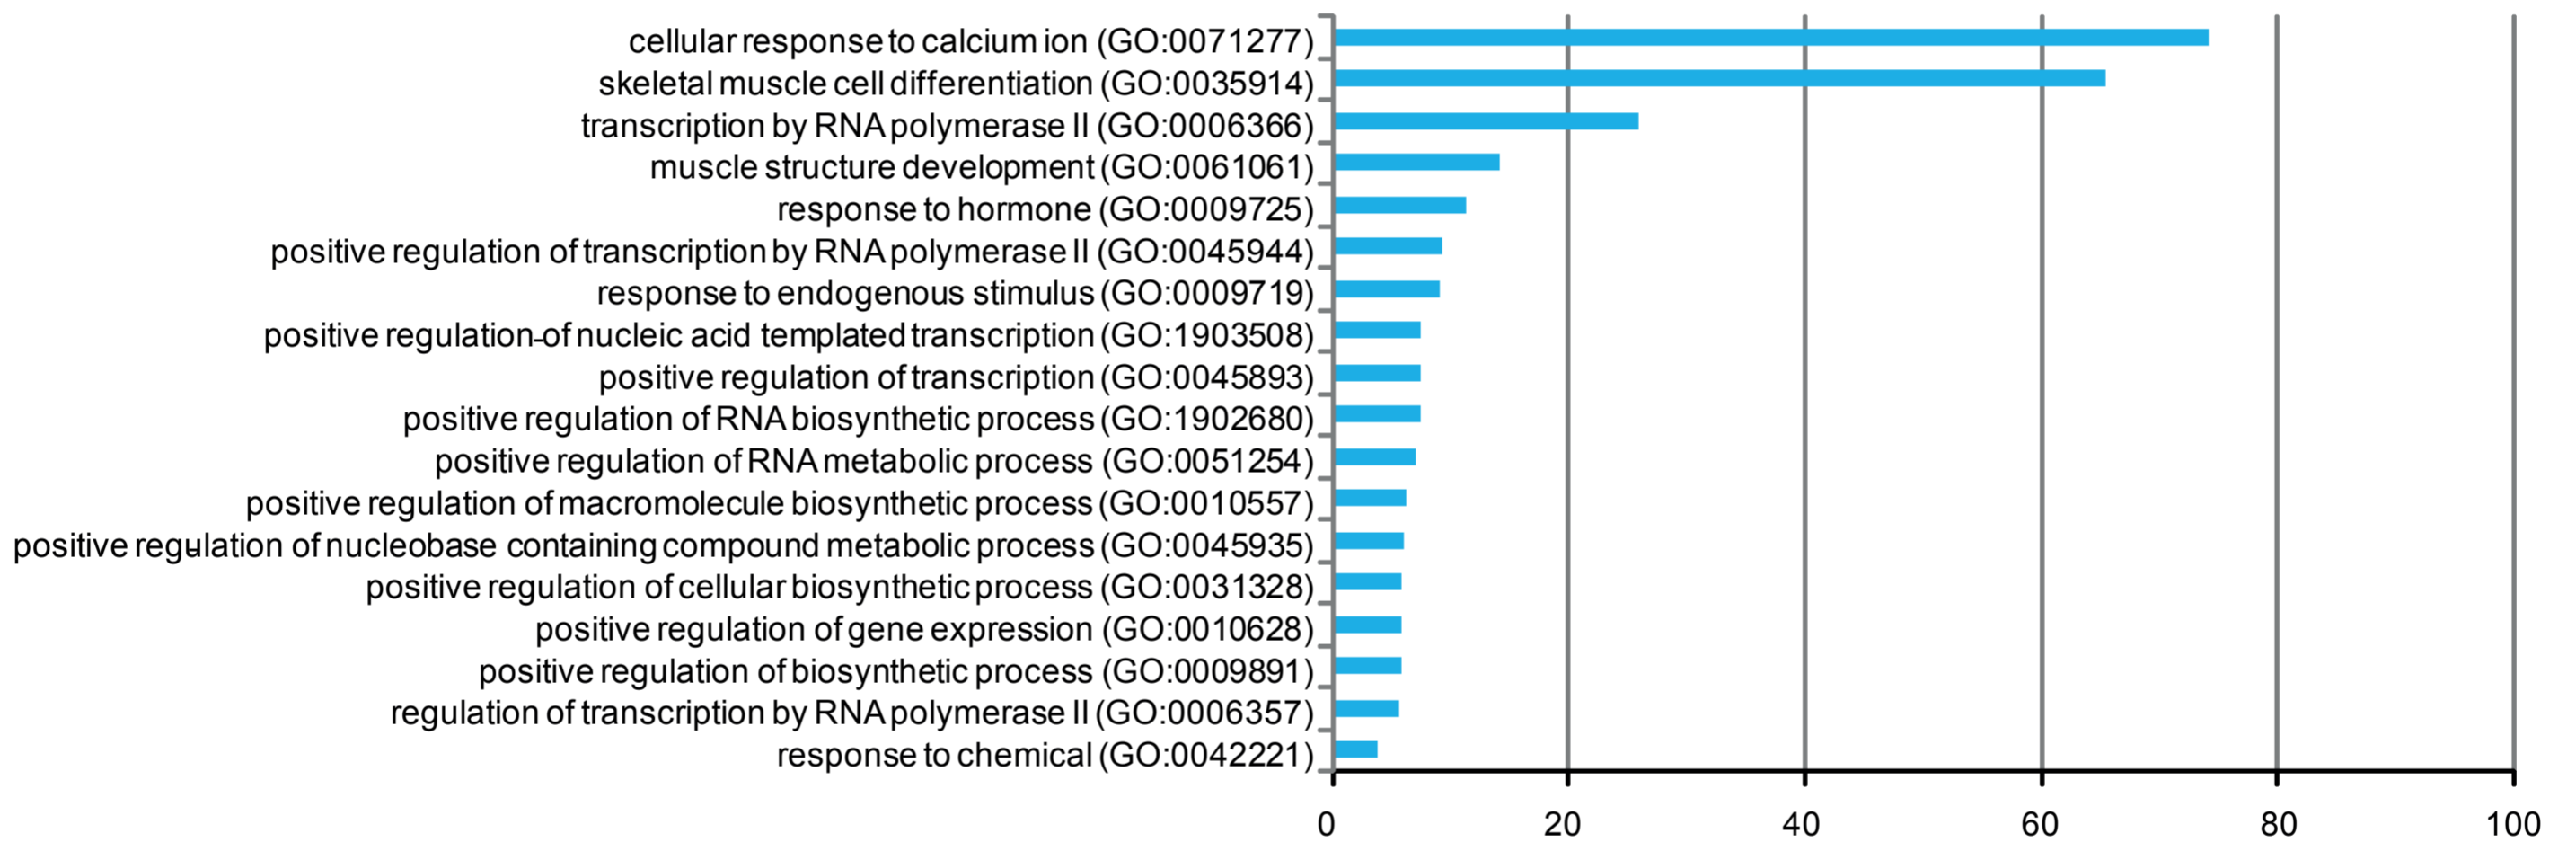

C P15 mPFC

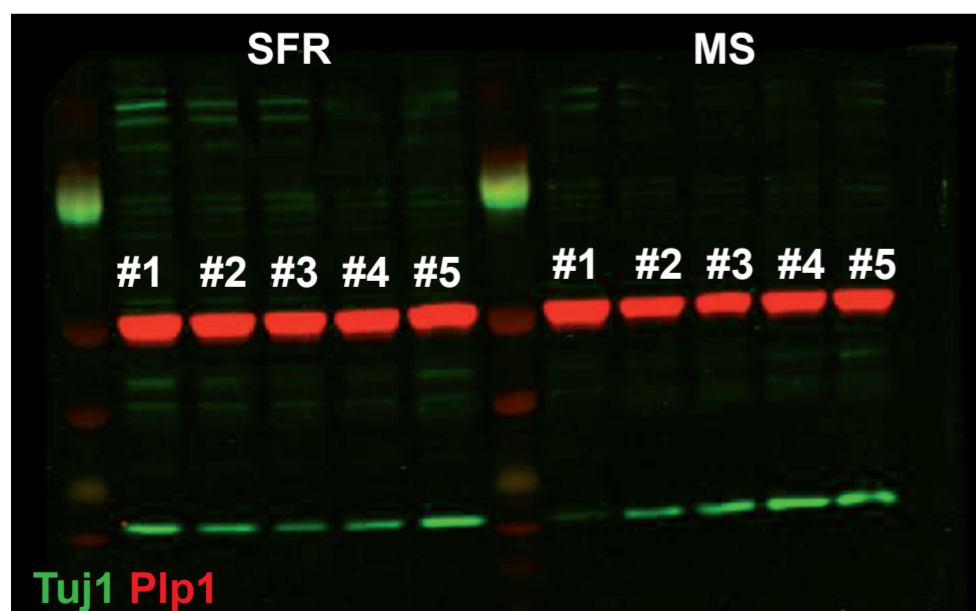

D P15 mPFC

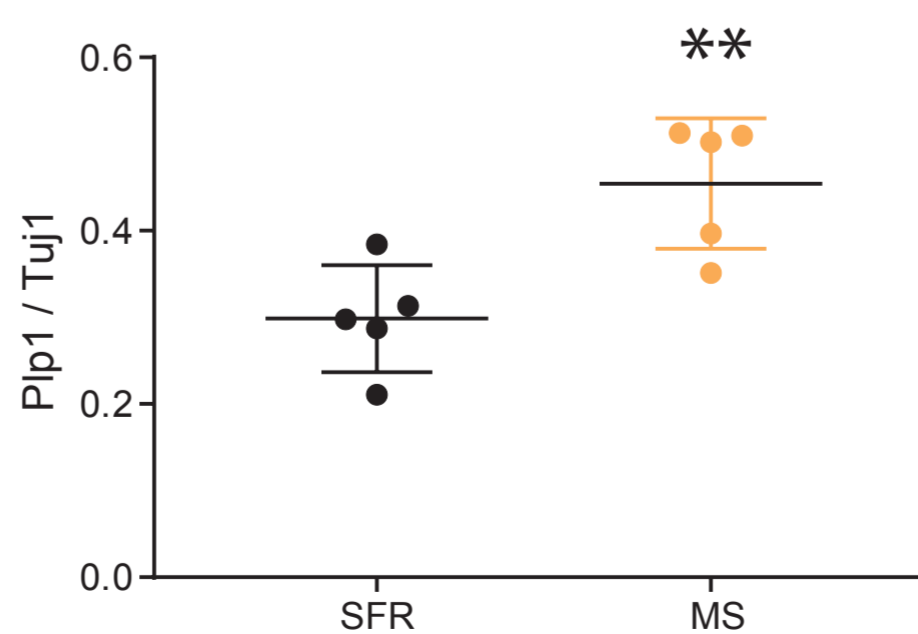

E Ault mPFC

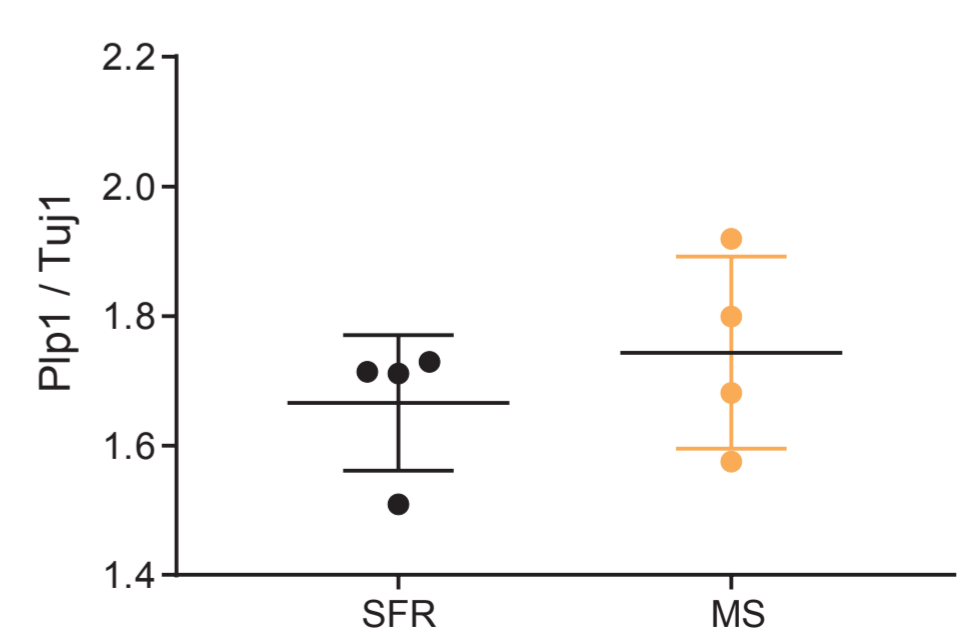

A

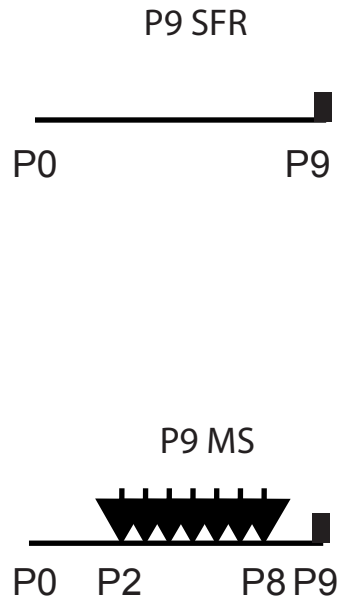

B

P9 mPFC

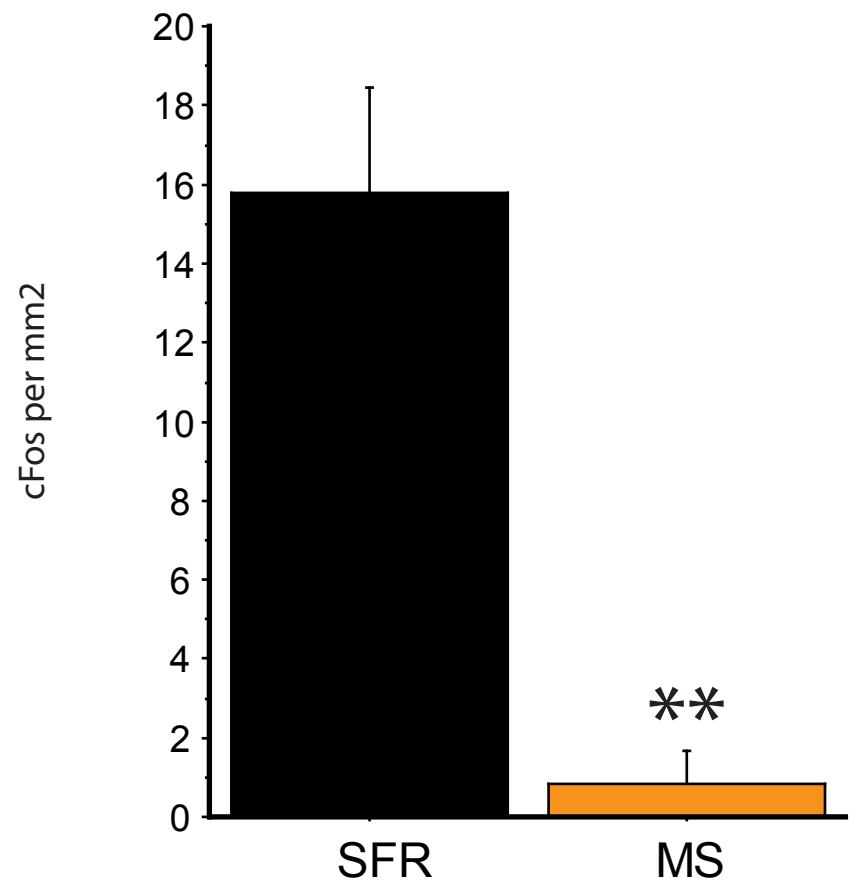

C

P9 mPFC

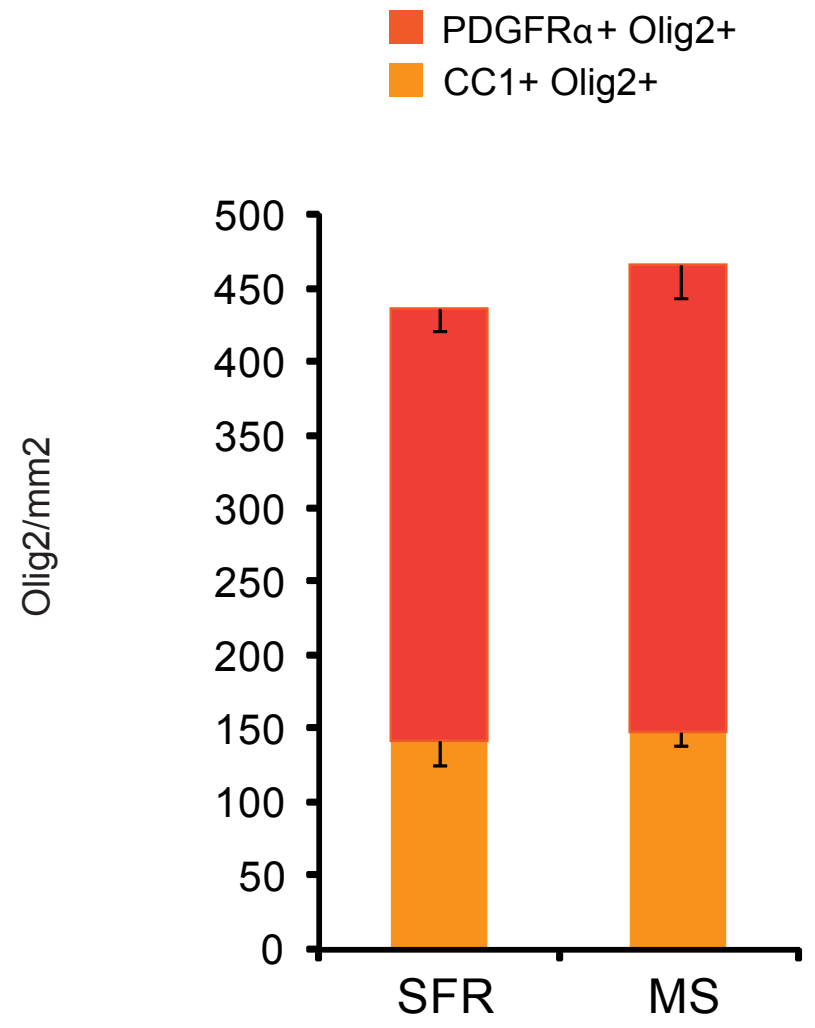

Supplementary Figure 2

### AAV8-hSyn-hM3Dq-mCherry

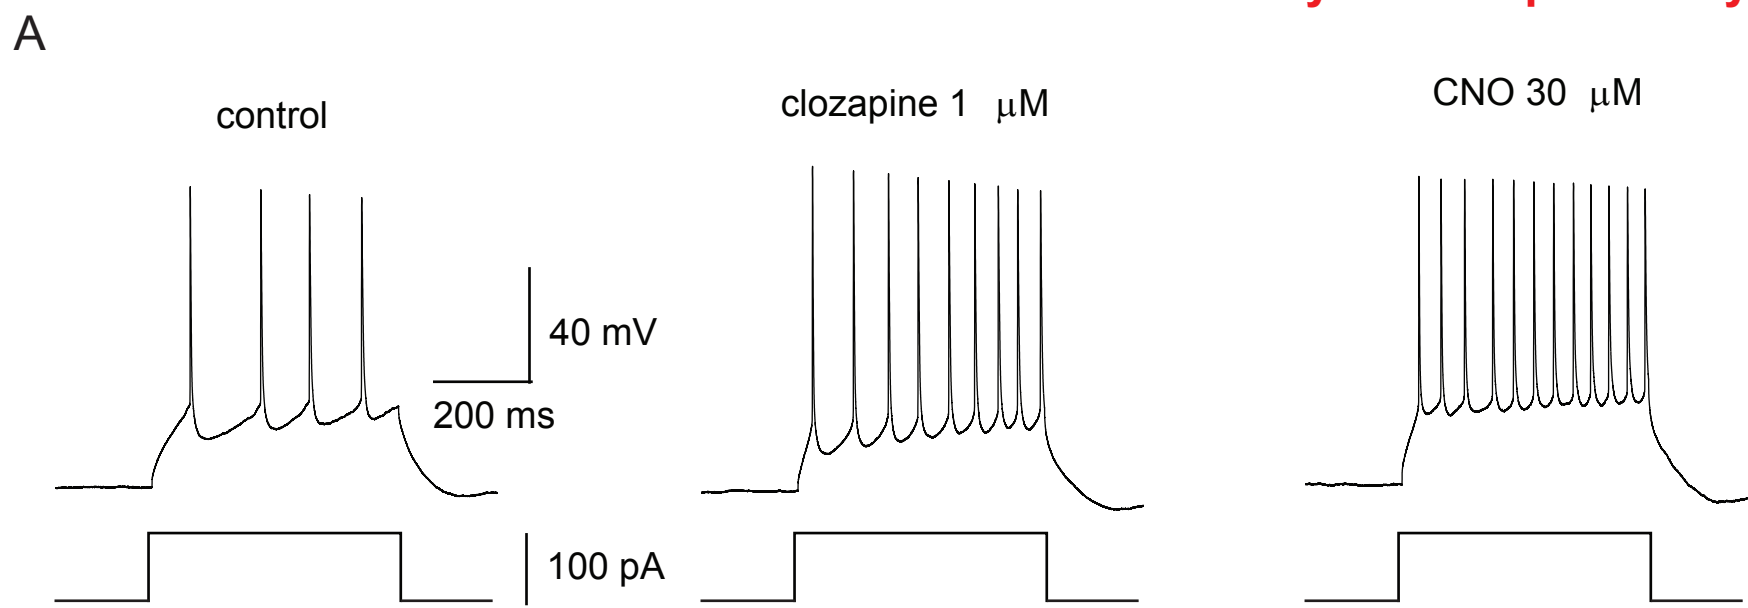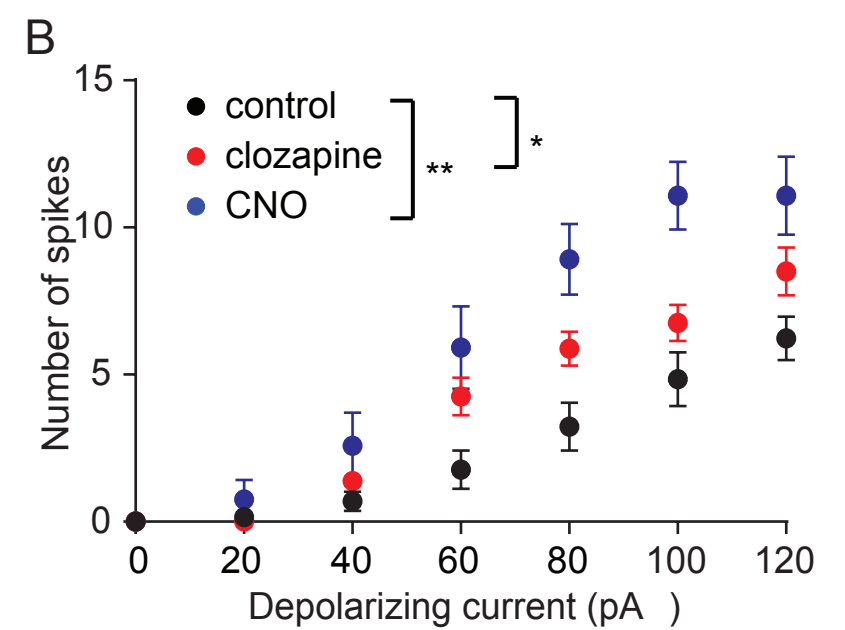

### AAV8-hSyn-hM4Di-mCherry

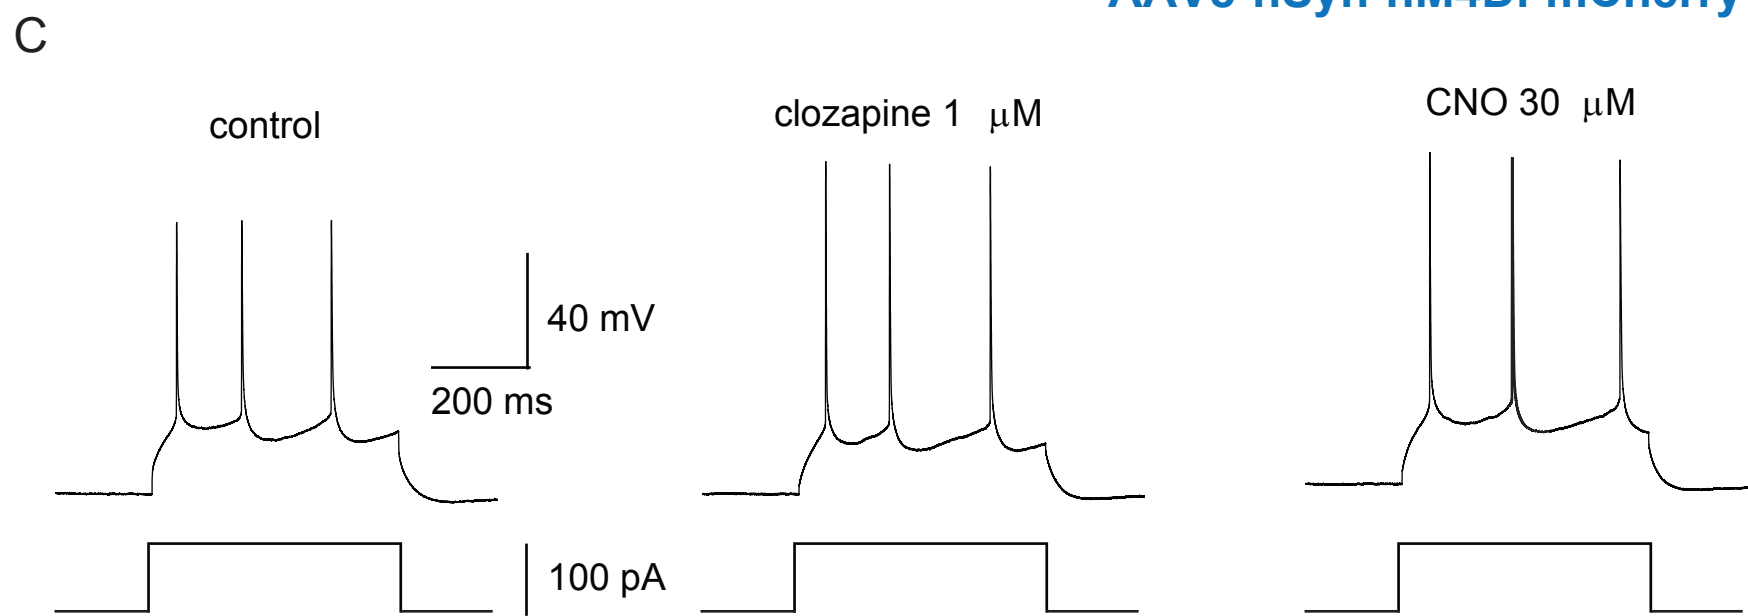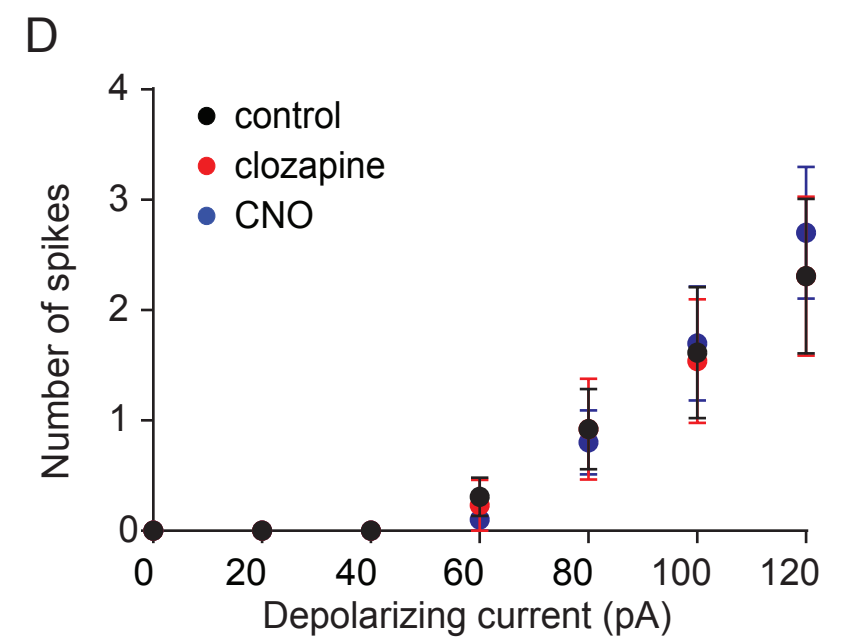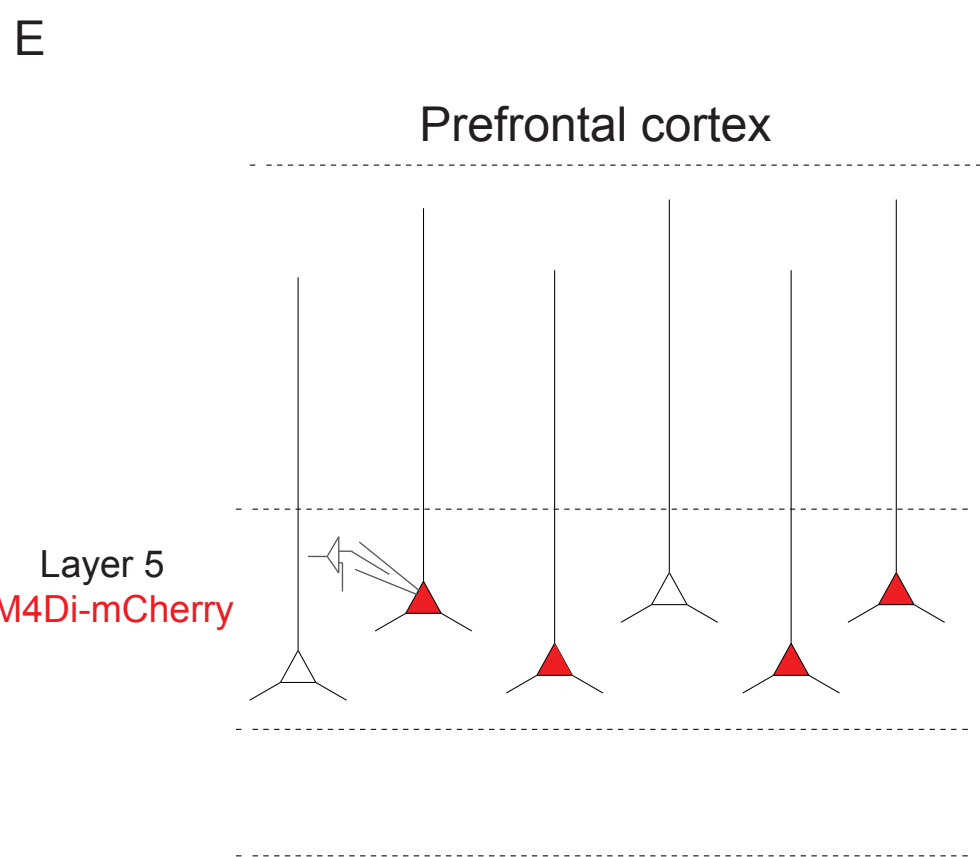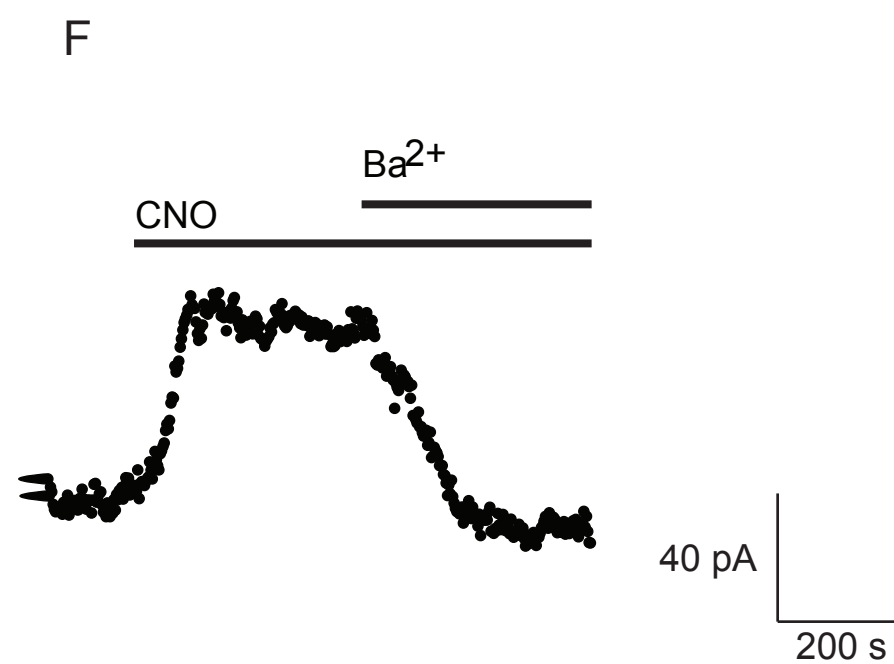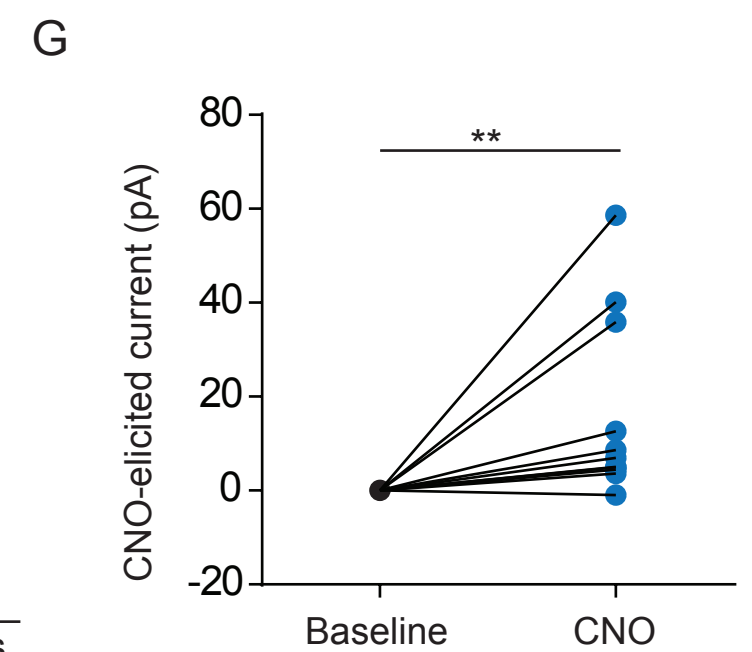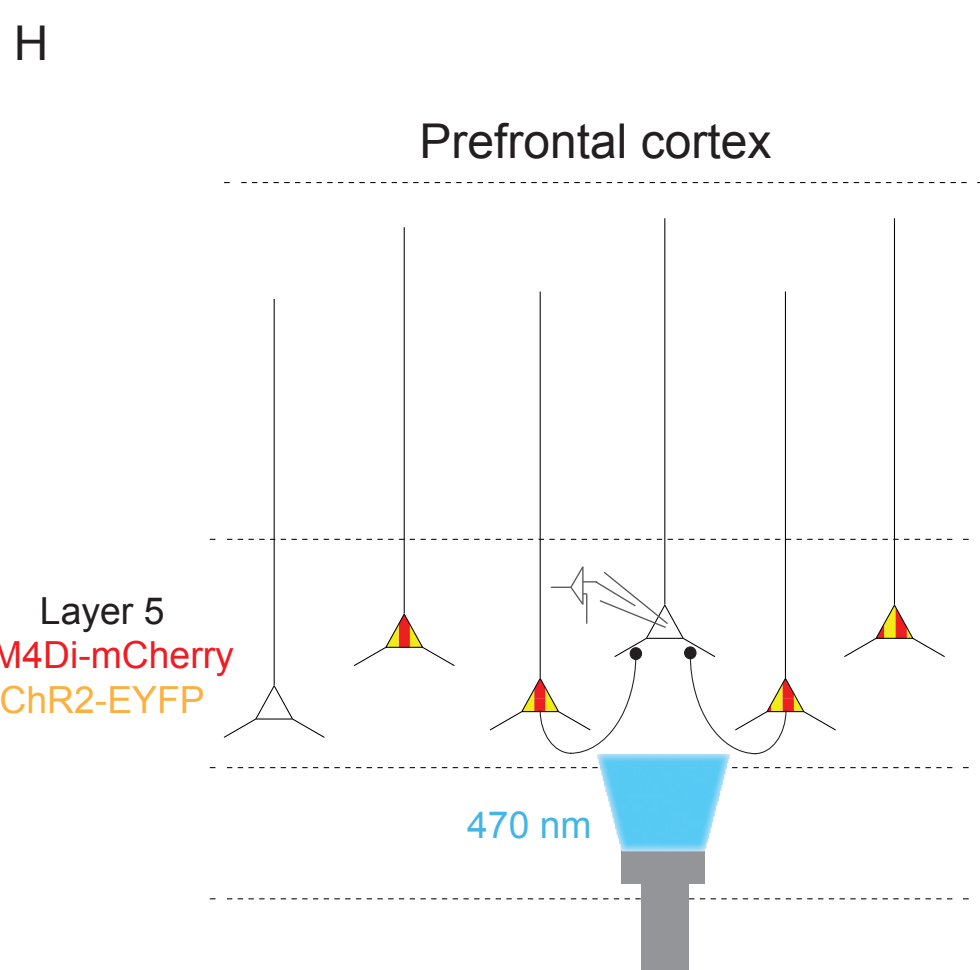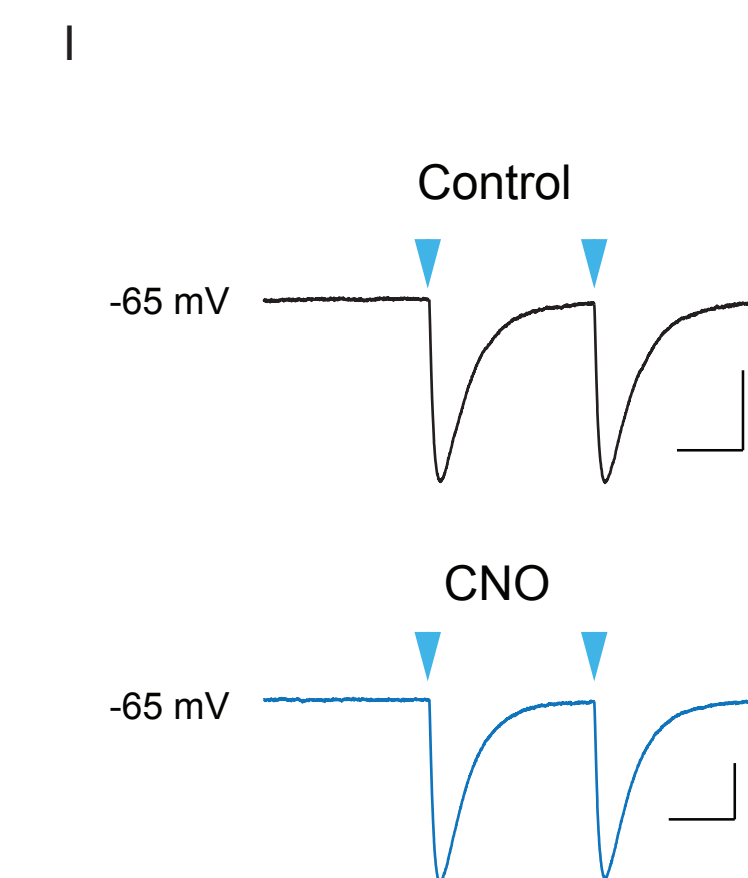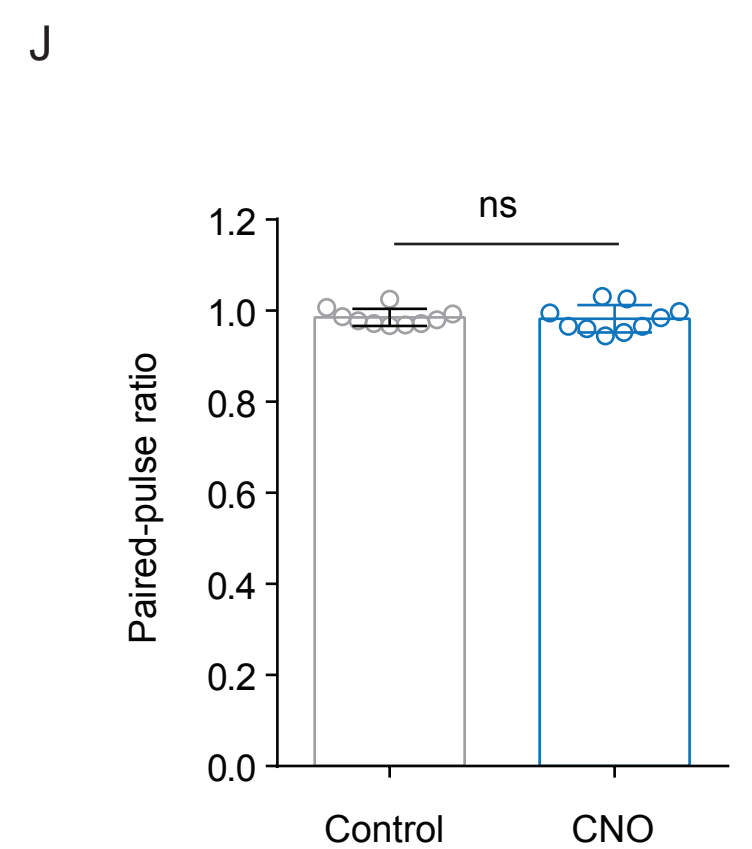

A

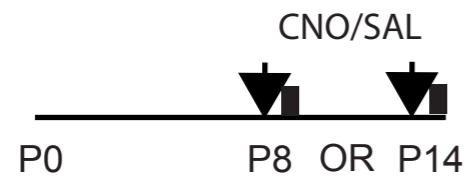

Egr1+/mCherry+ cells in SFR+hM4Di mPFC

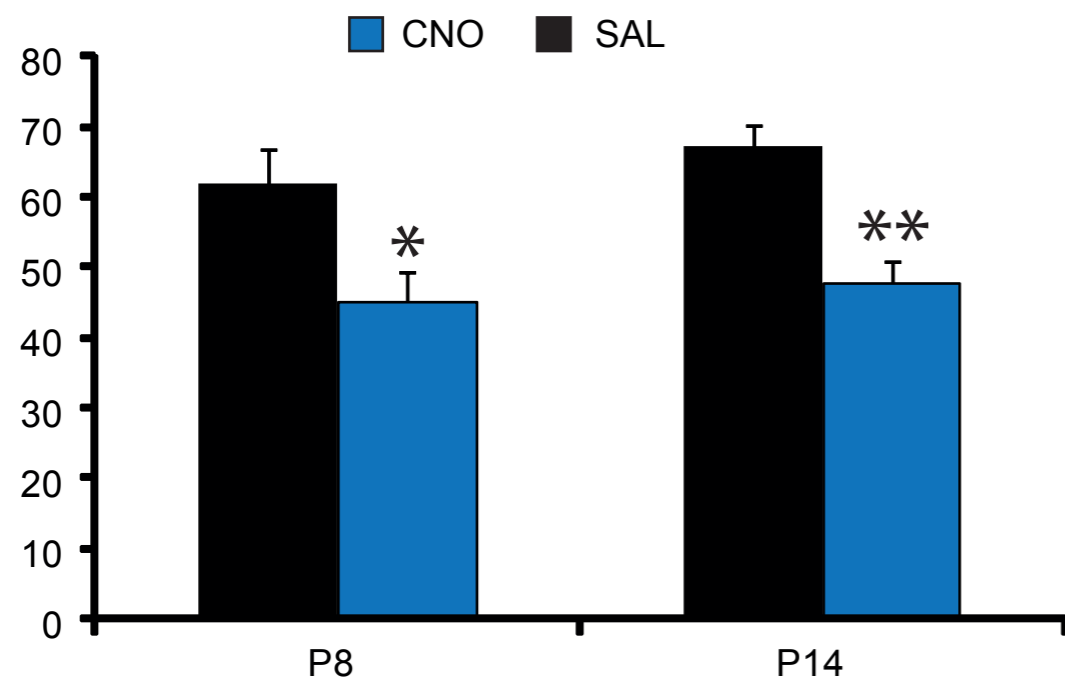

B

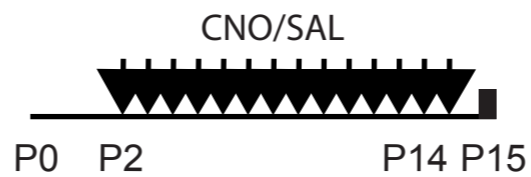

Fos+ cells/mm2 in P15 SFR+hM4Di mPFC

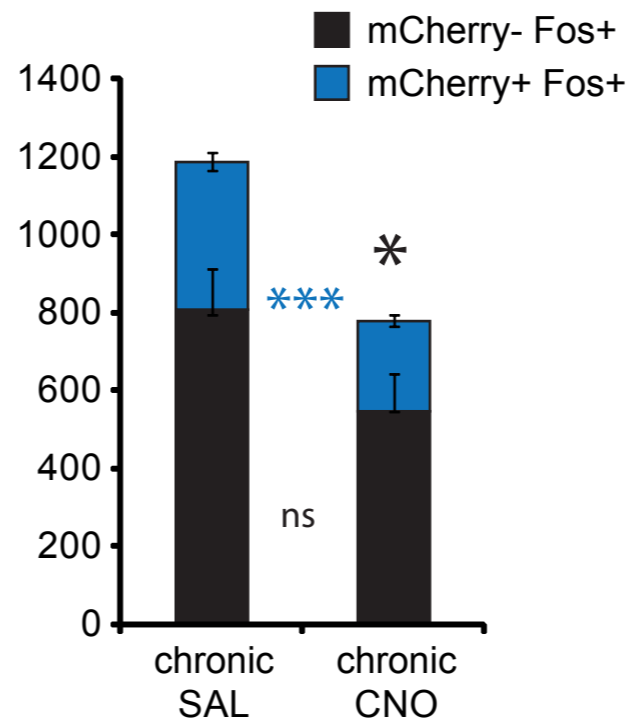

C

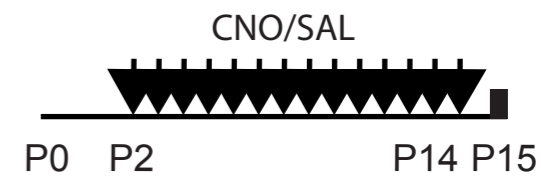

Fos+ cells/mm2 in P15 MS+hM3Di mPFC

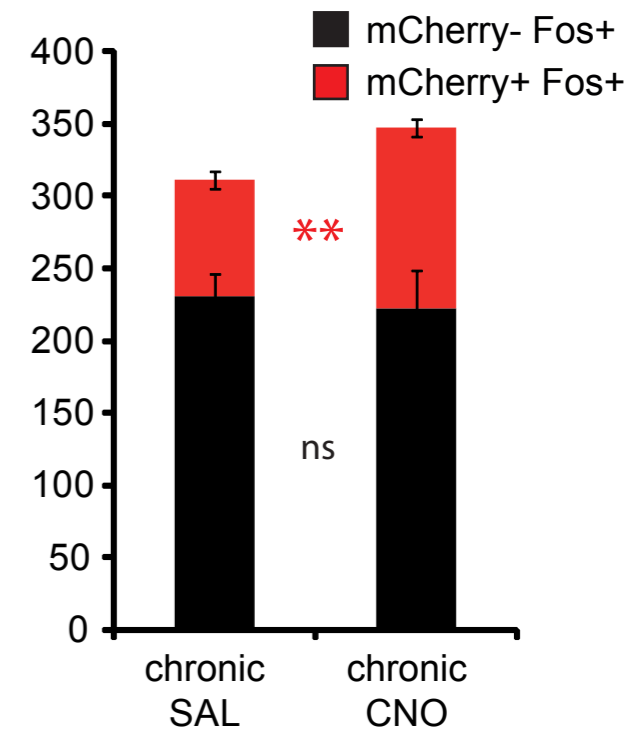

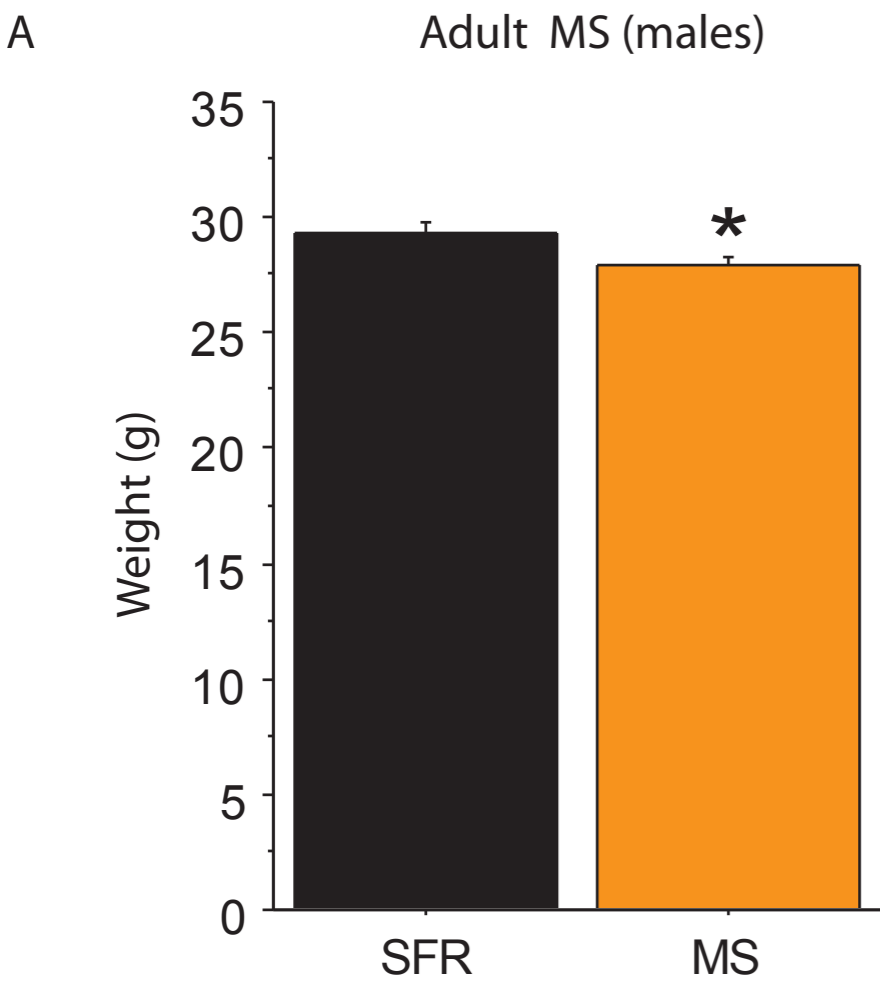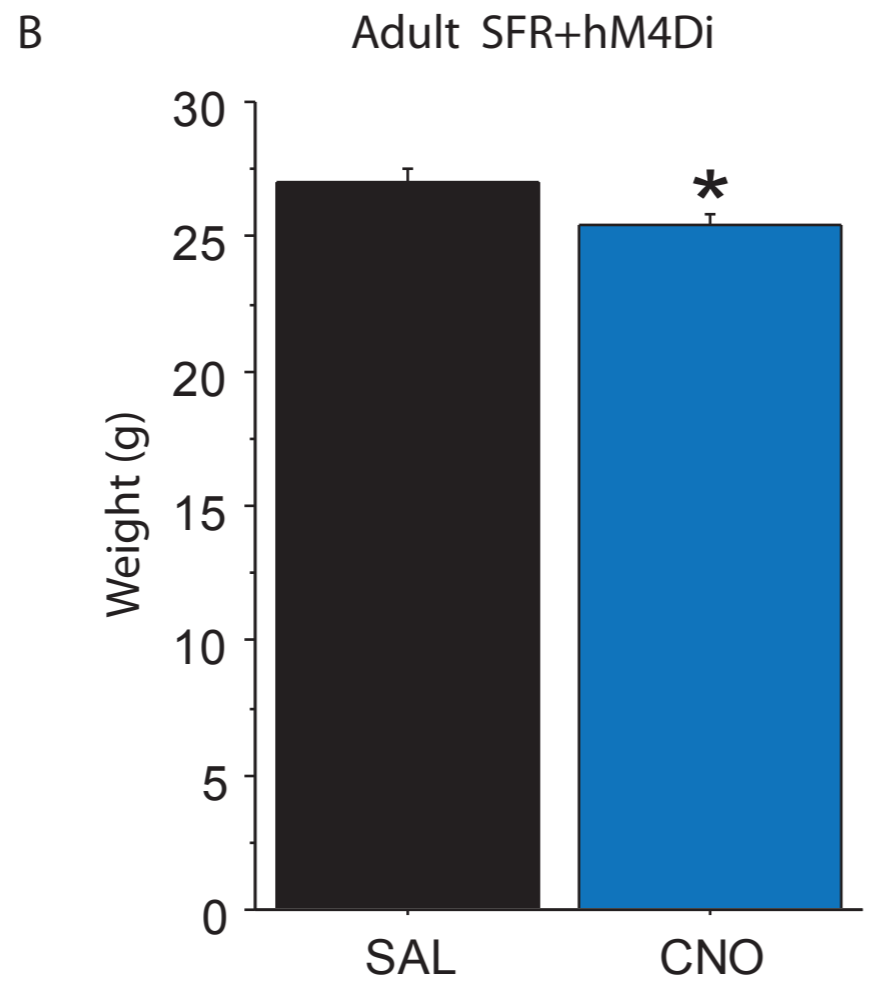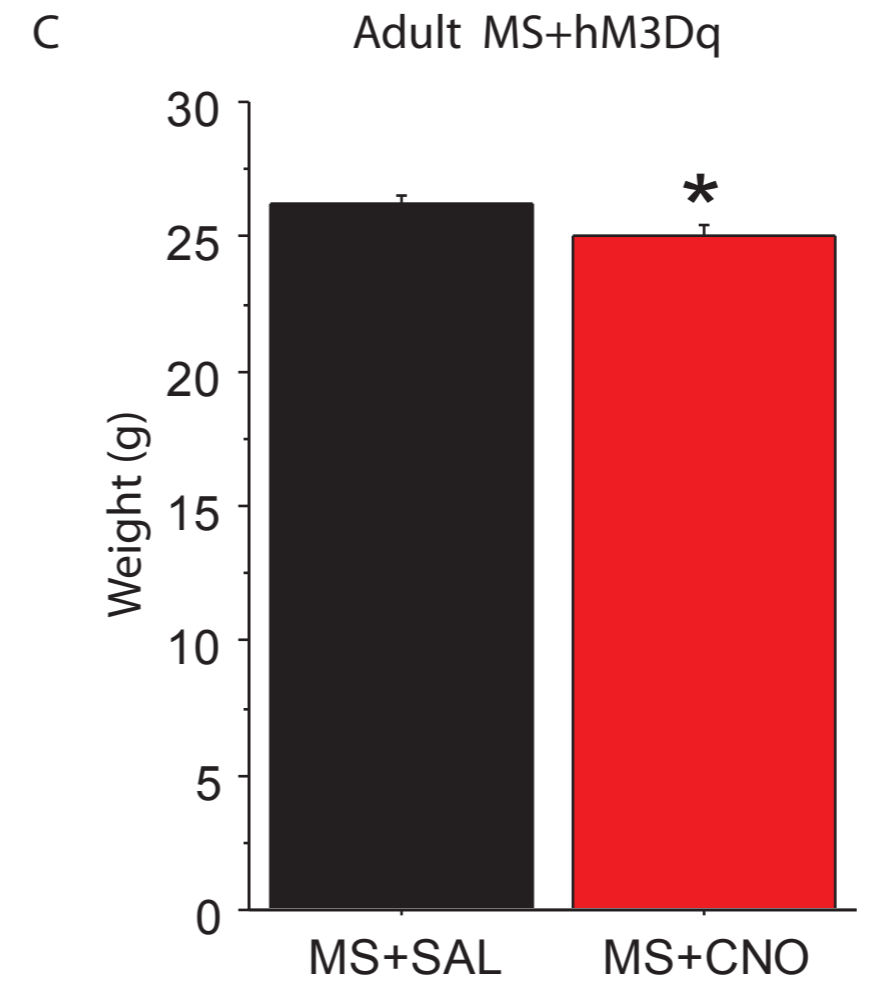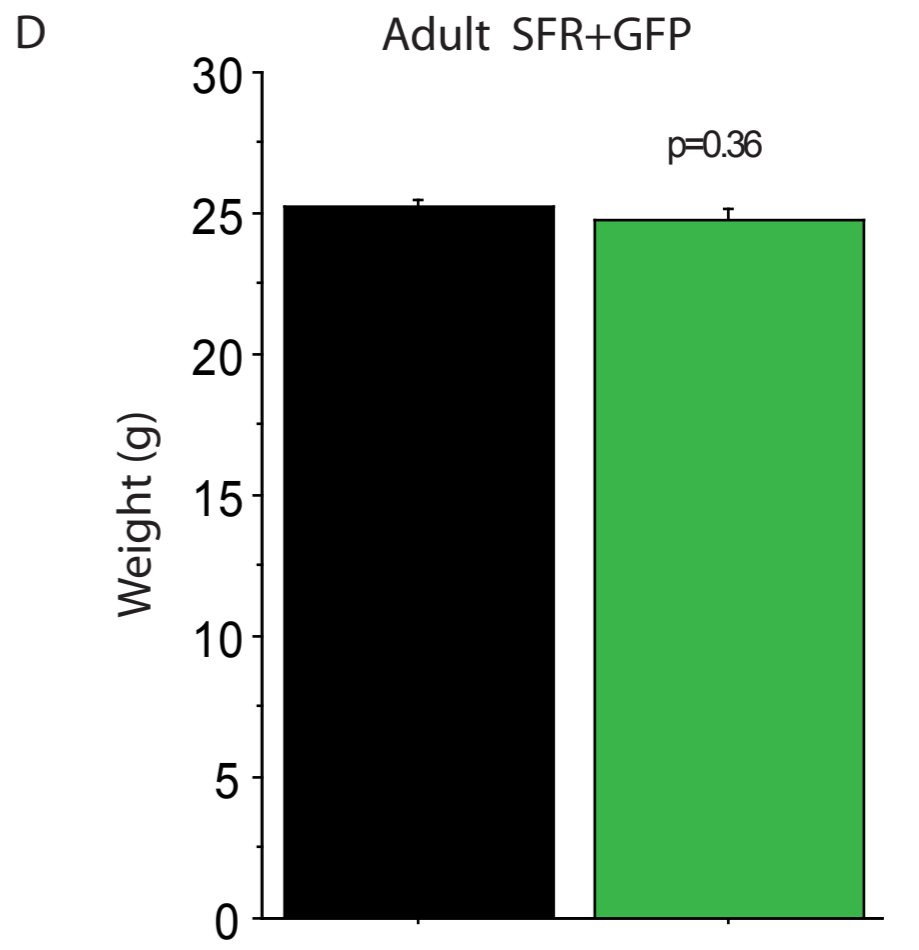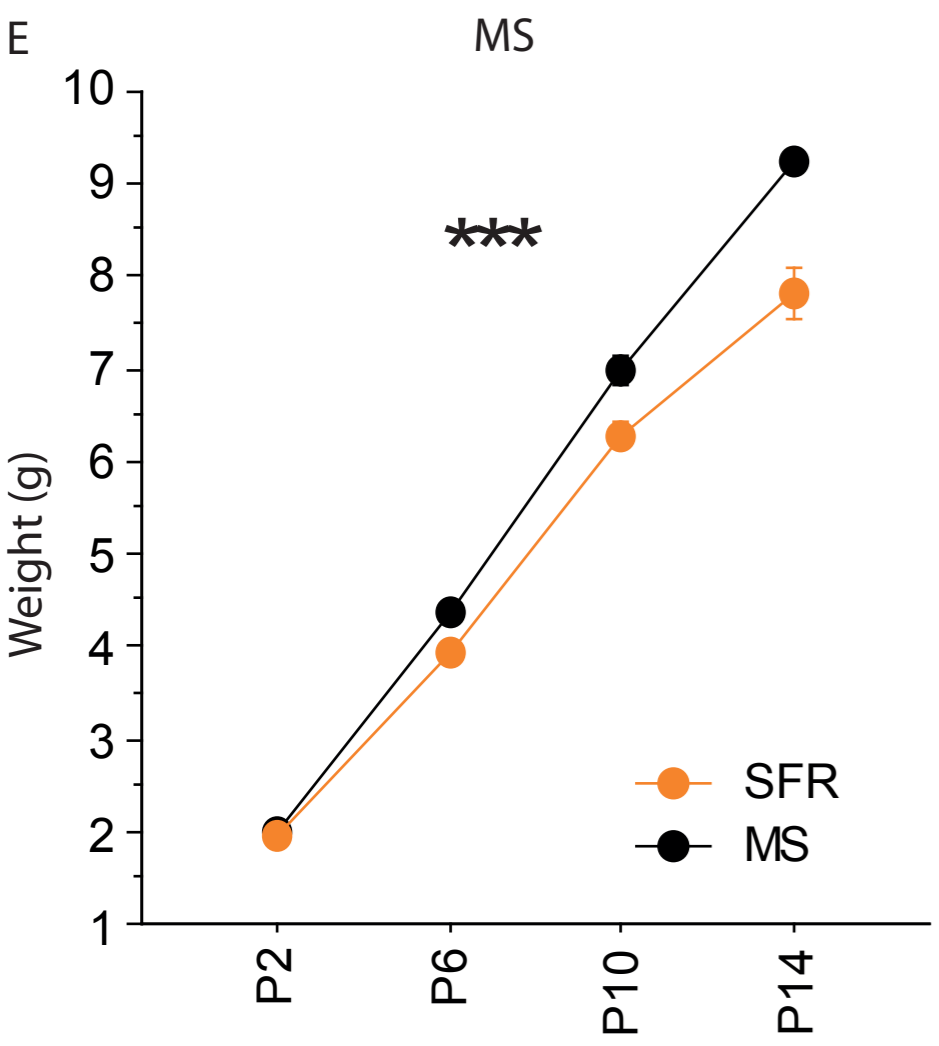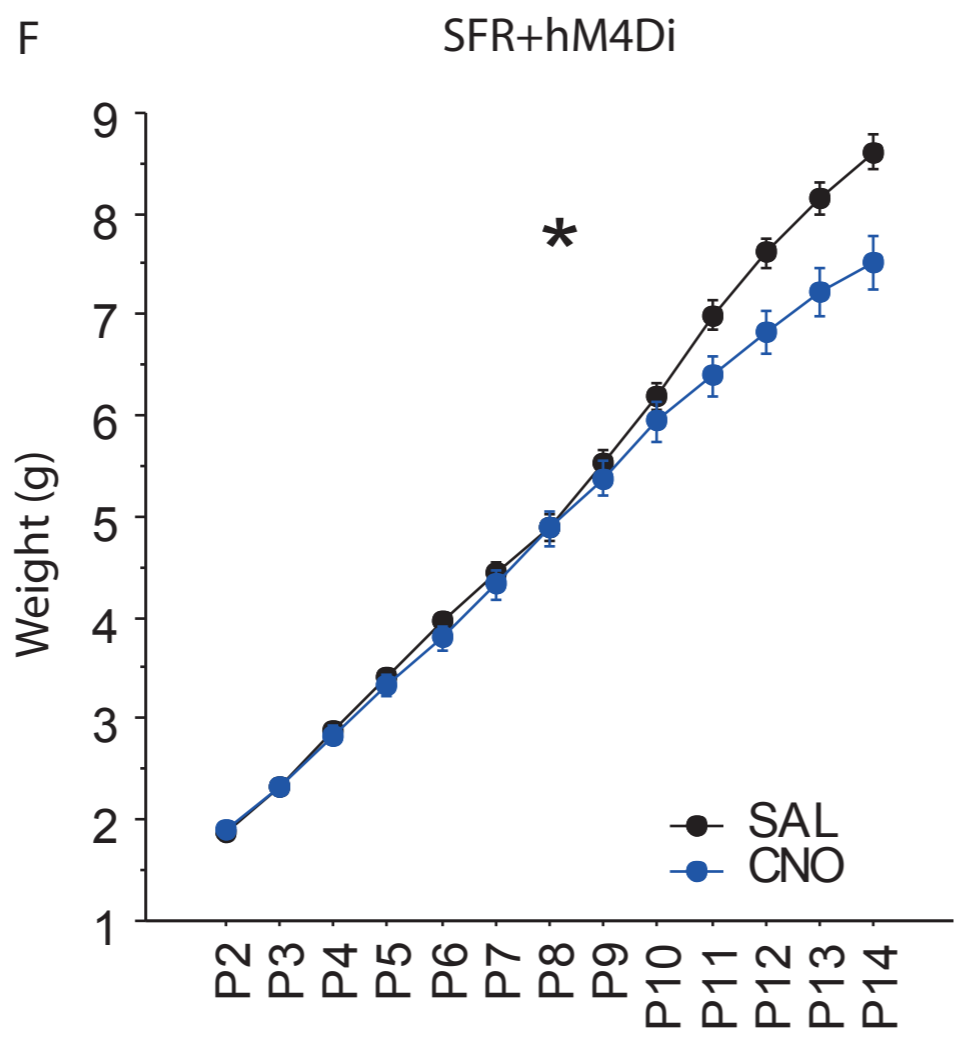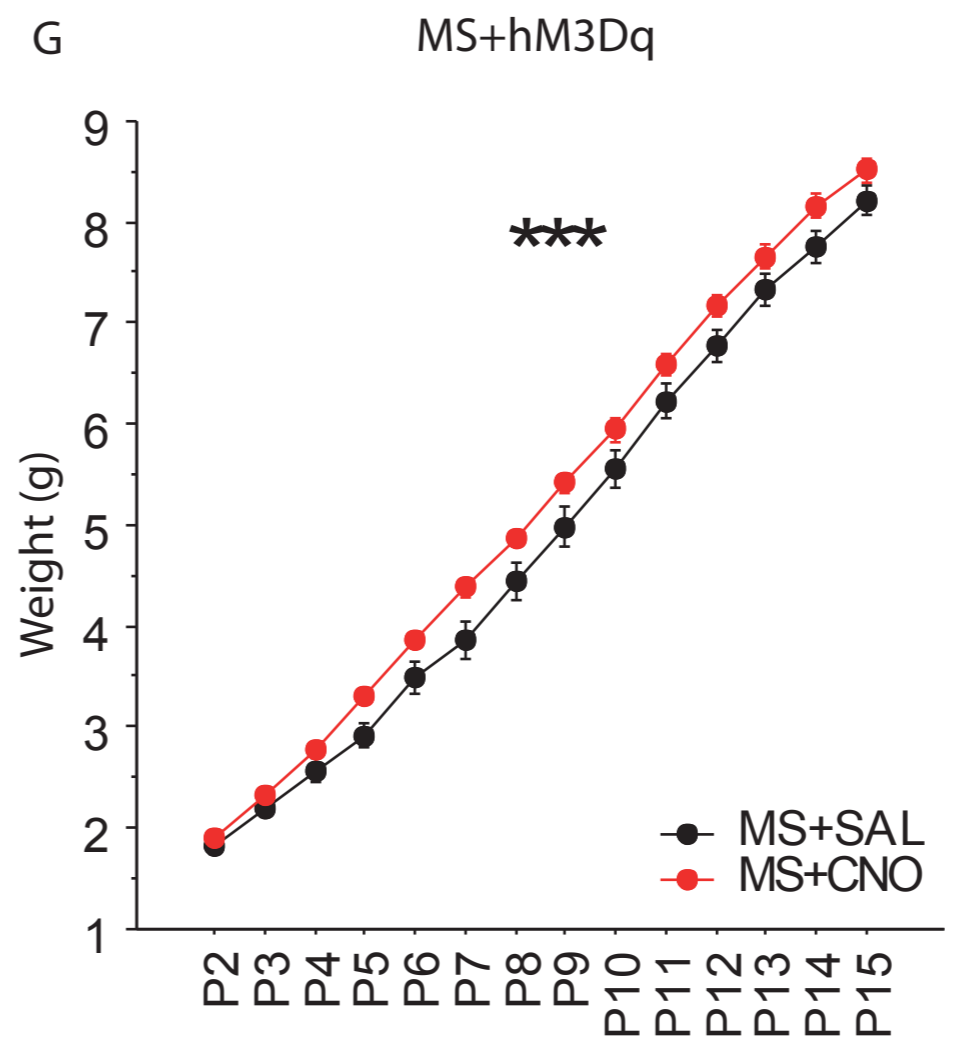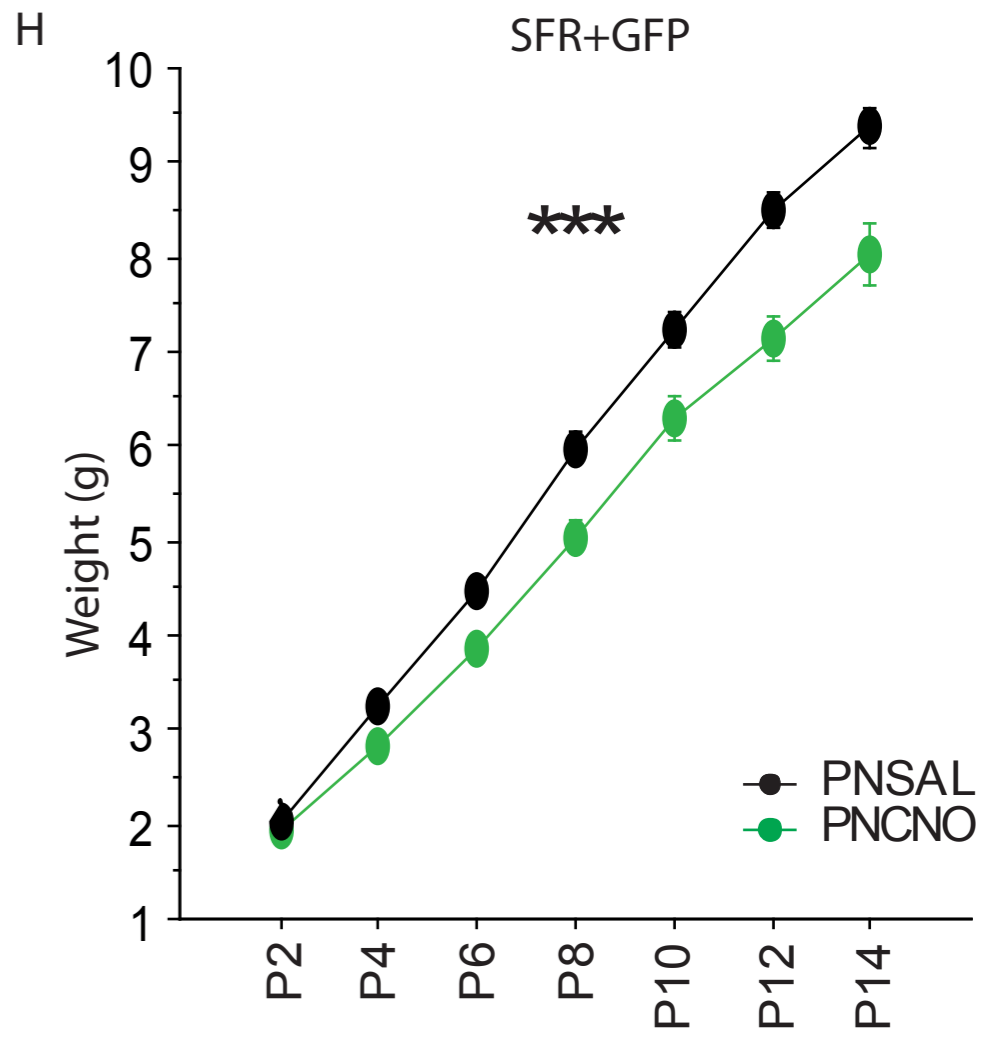

Supplementary Figure 5

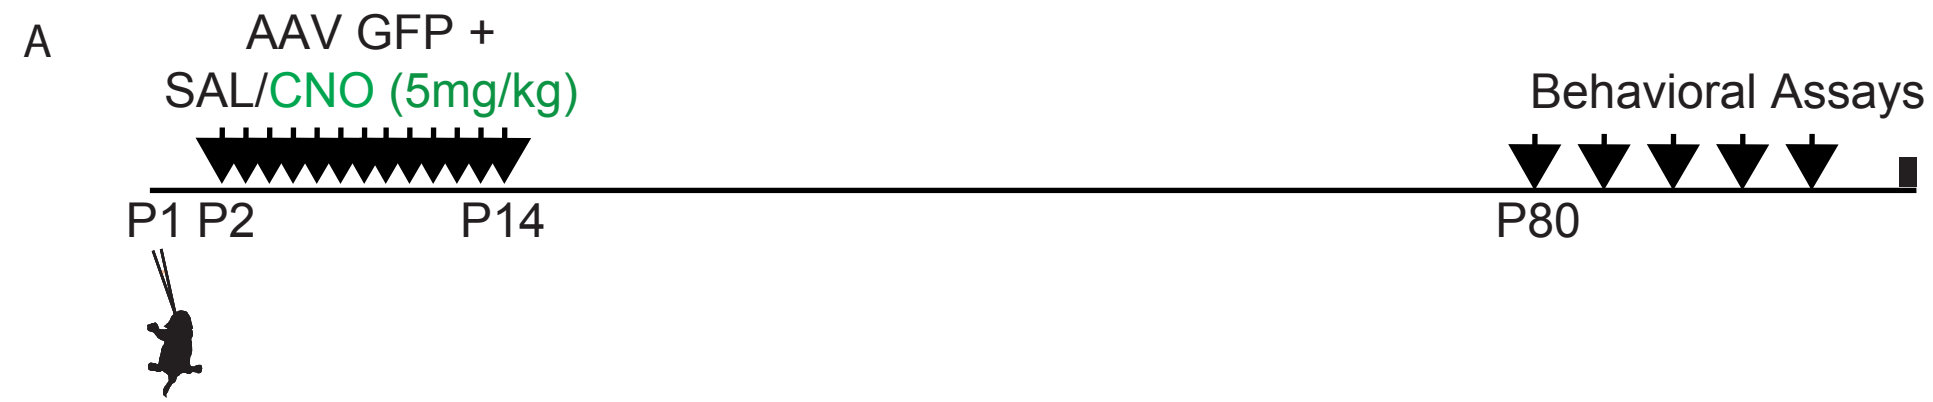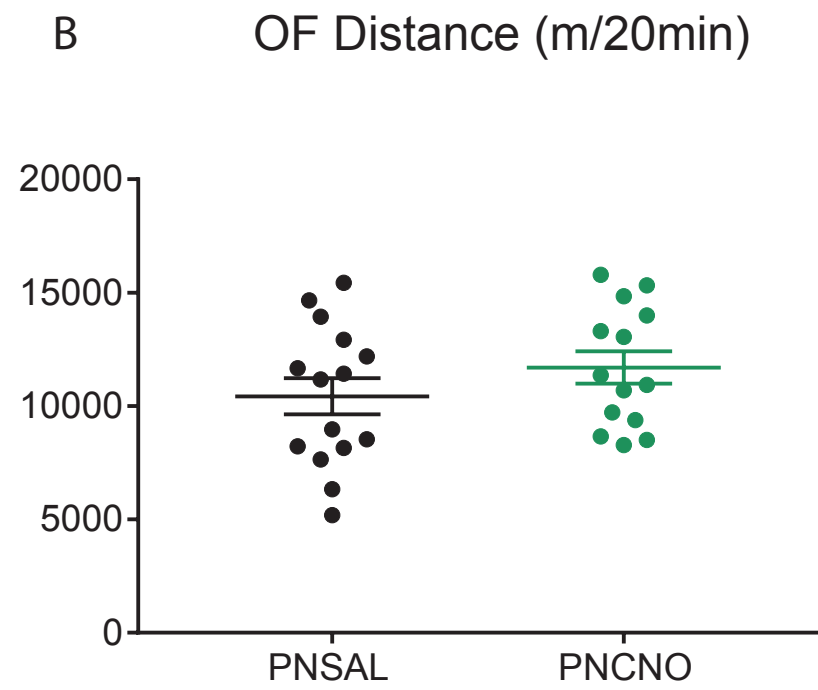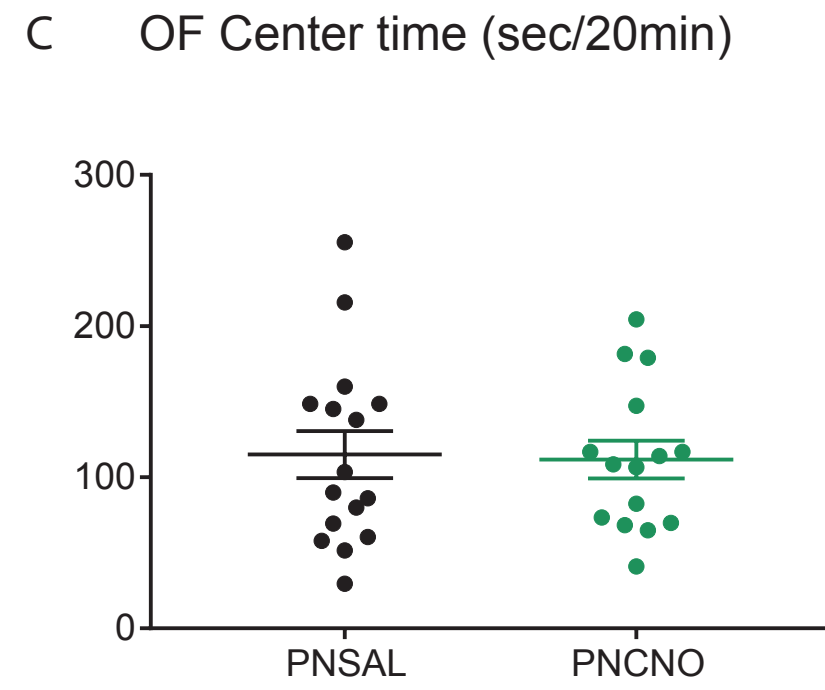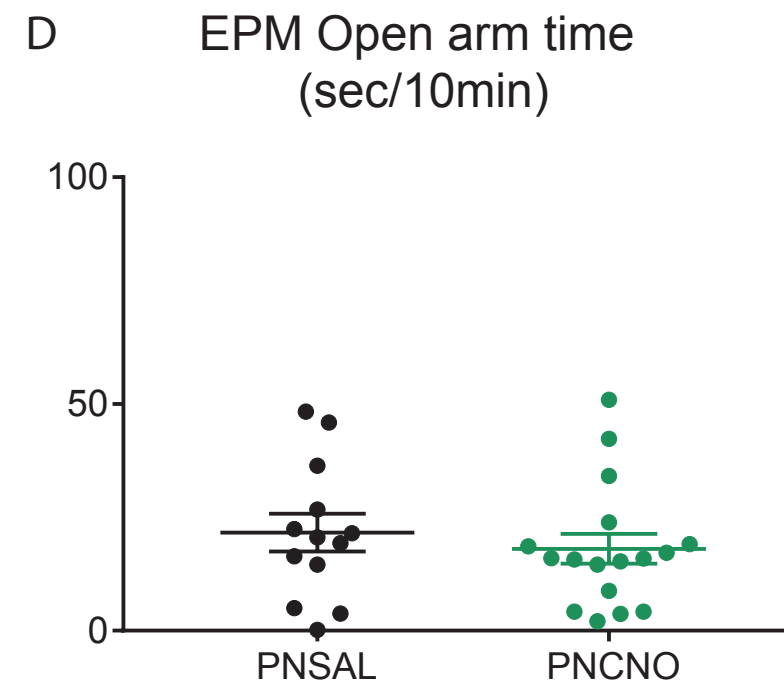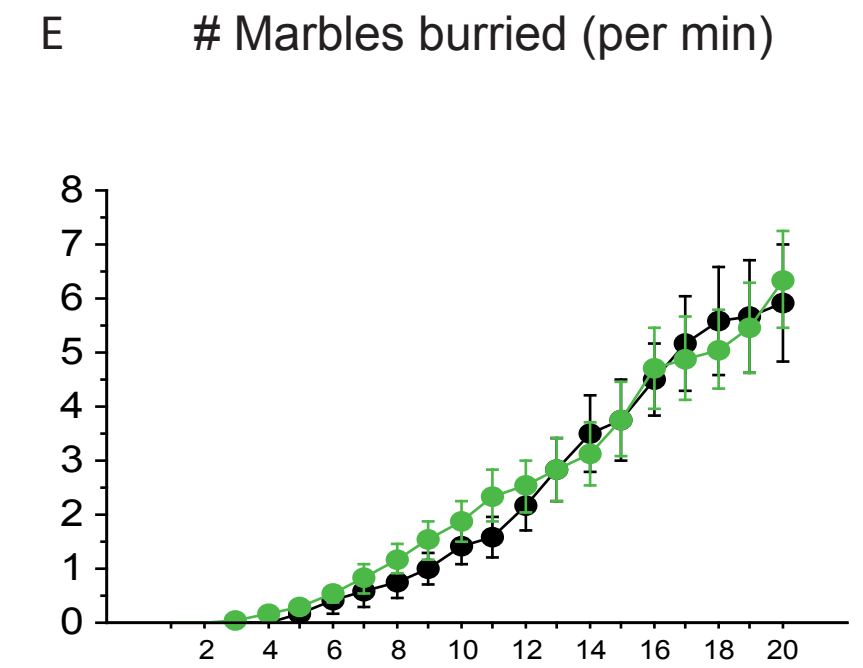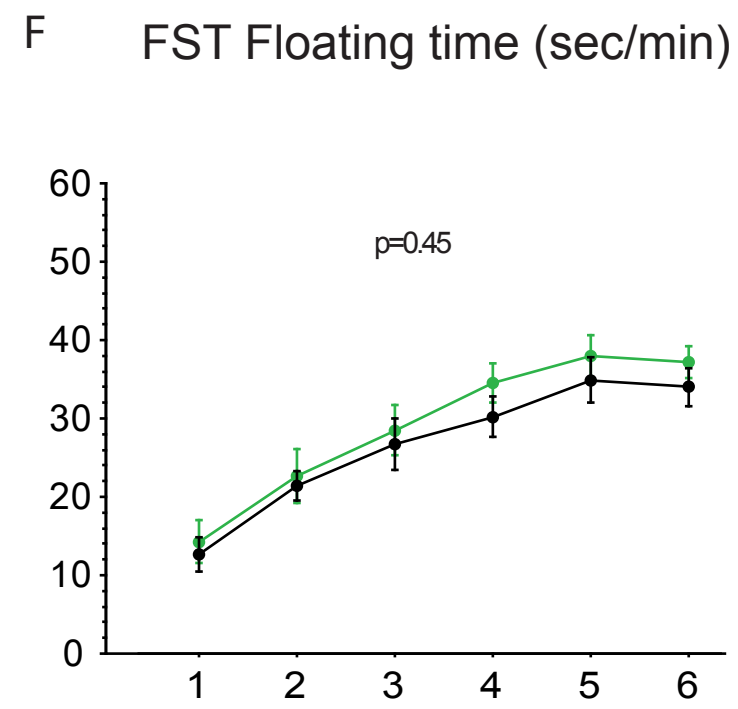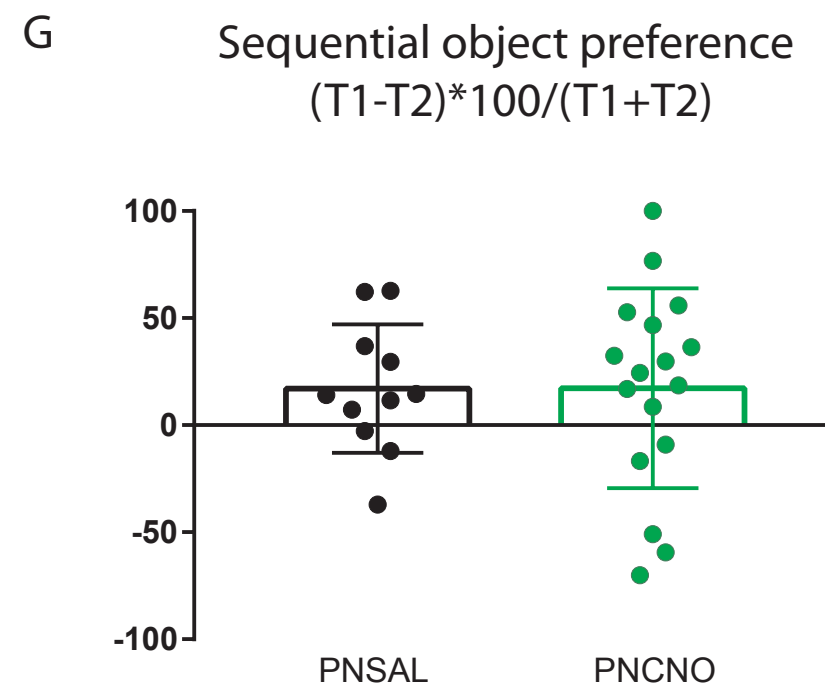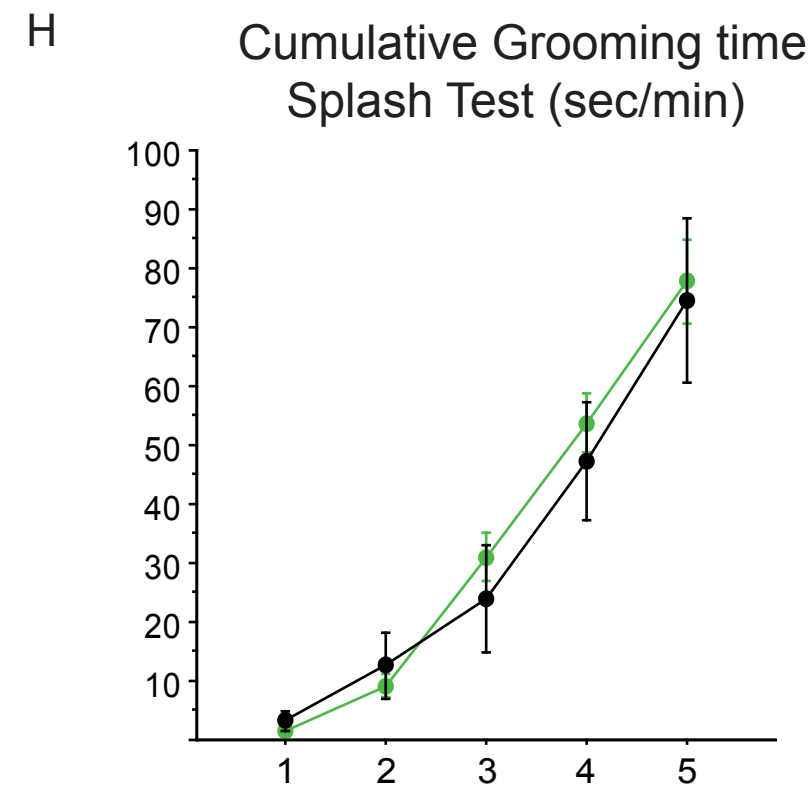

Supplementary Figure 6

**Supplementary Table 1: Differentially Expressed Genes after MS in P15 mPFC (q<0.05)**

| Associated Gene Name | LOG2 reads SFR | LOG2 FC MS   | p value     | qvalue      |
|----------------------|----------------|--------------|-------------|-------------|
| Egr2                 | 9,02375383     | -1,126006315 | 6,5E-21     | 1,08E-16    |
| Nr4a1                | 11,41156395    | -0,730383731 | 2,78E-17    | 2,3E-13     |
| Tspan2               | 9,762062828    | 0,720010208  | 5,77E-12    | 2,39E-08    |
| Ugt8a                | 9,517559001    | 0,797271877  | 1,1E-11     | 3,64E-08    |
| Scn4b                | 6,648903197    | 0,918592049  | 1,57E-11    | 4,35E-08    |
| Egr4                 | 10,30941143    | -0,528635473 | 1,11E-10    | 0,000000264 |
| Junb                 | 10,33996104    | -0,615224159 | 2,17E-10    | 0,00000045  |
| Gjc3                 | 7,652885845    | 0,632713474  | 2,52E-10    | 0,000000464 |
| Cd4                  | 1,460527981    | 2,42098154   | 3,26E-10    | 0,000000541 |
| Fos                  | 9,558588375    | -0,866091025 | 7,89E-09    | 0,00000872  |
| Ier2                 | 8,048671807    | -0,529595203 | 8,93E-09    | 0,00000925  |
| Gm28437              | 5,221248586    | 2,967628059  | 9,59E-09    | 0,00000936  |
| Arc                  | 11,95602984    | -0,758643317 | 0,000000011 | 0,0000101   |
| St18                 | 4,613254194    | 1,195836658  | 1,21E-08    | 0,0000106   |
| Lpar1                | 7,933875798    | 0,678589785  | 2,45E-08    | 0,0000203   |
| Prlr                 | 4,532633011    | -2,001629386 | 0,000000213 | 0,000139417 |
| Plp1                 | 12,60011609    | 0,83878217   | 0,000000219 | 0,000139417 |
| Ernm                 | 6,62903443     | 0,900631705  | 0,000000396 | 0,000234541 |
| Nts                  | 4,842267279    | -0,885197351 | 0,000000442 | 0,000252899 |
| Myrf                 | 8,681915138    | 0,551147447  | 0,000000568 | 0,00030364  |
| Mag                  | 10,05480175    | 0,840152772  | 0,000000562 | 0,00030364  |
| Fosb                 | 8,49062432     | -0,685752069 | 0,000000633 | 0,000327936 |
| Eomes                | 2,087515124    | 1,912468164  | 0,000000867 | 0,000435788 |
| Gm13066              | 5,526470294    | -0,620020444 | 0,00000102  | 0,000487098 |
| Mobp                 | 11,11124947    | 0,923463751  | 0,00000103  | 0,000487098 |
| Adamts4              | 7,72845064     | 0,620668354  | 0,00000139  | 0,000604872 |
| Plxnb3               | 8,43739156     | 0,56462054   | 0,00000235  | 0,000950779 |
| Nr1i3                | 6,054142033    | -0,500907386 | 0,00000305  | 0,001204231 |
| Clic6                | 3,997992816    | -1,042206393 | 0,00000355  | 0,00133789  |
| Mog                  | 7,405370509    | 0,755453762  | 0,00000348  | 0,00133789  |
| Ppp1r1b              | 9,604652043    | 0,646620602  | 0,00000391  | 0,00144239  |
| Fa2h                 | 7,863464422    | 0,729353204  | 0,00000519  | 0,001869891 |
| Cldn11               | 9,659859378    | 0,804930069  | 0,00000541  | 0,001910377 |
| Pde10a               | 10,19689363    | 0,396871906  | 0,00000609  | 0,002055066 |
| Ntf3                 | 4,744423666    | -0,769804677 | 0,0000074   | 0,002359843 |
| Cnksr3               | 7,061357185    | 0,581960942  | 0,00000789  | 0,002467867 |
| Gsn                  | 9,496893965    | 0,657798115  | 0,00000835  | 0,002564693 |
| ErbB3                | 6,63106478     | 0,638710738  | 0,00000892  | 0,002639535 |
| Thbs4                | 4,459510775    | 0,949831152  | 0,00001     | 0,002813664 |
| 1700016P03Rik        | 6,371516477    | -0,596772857 | 0,0000112   | 0,003089316 |
| Nkx6-2               | 4,930460027    | 0,915398433  | 0,0000142   | 0,003810841 |
| 1810049J17Rik        | 5,285190416    | -0,858678538 | 0,0000165   | 0,004270157 |
| Ddc                  | 5,586004781    | 0,734670344  | 0,0000173   | 0,004350241 |
| Cnp                  | 11,27643462    | 0,618838219  | 0,0000188   | 0,004645962 |
| Gm4409               | 5,519508287    | -0,561333921 | 0,0000192   | 0,004693585 |
| Hipk4                | 5,24654989     | -0,544687464 | 0,0000233   | 0,005590229 |
| Rnf122               | 7,312323235    | 0,544814982  | 0,0000241   | 0,005713819 |
| Fbxo32               | 6,923939992    | 0,560622746  | 0,0000248   | 0,005781423 |
| Rasgef1b             | 9,64835912     | 0,410577466  | 0,000028    | 0,006371634 |
| Mbp                  | 13,91411933    | 0,777938255  | 0,0000299   | 0,006711352 |
| Adora2a              | 6,022648217    | 0,584921755  | 0,0000367   | 0,008088682 |
| Elovl7               | 6,926672412    | 0,620958585  | 0,0000371   | 0,008088682 |
| Slc45a3              | 3,781312709    | 1,000140868  | 0,0000411   | 0,008743406 |
| 1700047M11Rik        | 5,468802989    | 0,833857795  | 0,0000434   | 0,009119293 |
| Gm15337              | 4,768984581    | -0,682221596 | 0,0000452   | 0,009363815 |
| Tpx2                 | 5,948555967    | 0,609754926  | 0,0000526   | 0,010621885 |
| Mal                  | 8,407818278    | 0,903169585  | 0,0000519   | 0,010621885 |
| 4930404N11Rik        | 5,227762848    | -0,734521179 | 0,0000583   | 0,011512271 |
| ErbB2ip              | 9,421443092    | 0,409296601  | 0,0000672   | 0,012804779 |
| Anln                 | 5,864631814    | 0,674209603  | 0,0000999   | 0,018411831 |
| Plekhh1              | 7,251100575    | 0,491337231  | 0,0000997   | 0,018411831 |
| Mob3b                | 6,265102048    | 0,640626217  | 0,000105023 | 0,018932366 |
| Tmem88b              | 8,052224336    | 0,695812026  | 0,000105028 | 0,018932366 |

|                      |             |              |             |             |
|----------------------|-------------|--------------|-------------|-------------|
| <b>Sgk2</b>          | 3,210154152 | 1,328355184  | 0,000117092 | 0,020880206 |
| <b>Carhsp1</b>       | 7,645317422 | 0,535047937  | 0,000144918 | 0,025567205 |
| <b>Kif19a</b>        | 6,994888974 | 0,549714314  | 0,000166517 | 0,029068544 |
| <b>Syndig1l</b>      | 6,65459875  | 0,517832345  | 0,000174901 | 0,029902589 |
| <b>Casr</b>          | 4,988691236 | 0,711601482  | 0,000207125 | 0,03302854  |
| <b>Cyb5d1</b>        | 7,030386252 | 0,483482965  | 0,00021898  | 0,034586384 |
| <b>RP23-332E2.7</b>  | 3,729200235 | -0,923109694 | 0,00022695  | 0,035506921 |
| <b>Oprk1</b>         | 5,600679909 | 0,655892667  | 0,000239432 | 0,037109723 |
| <b>Mir212</b>        | 3,357725456 | -1,357881457 | 0,00025662  | 0,038892967 |
| <b>Lox</b>           | 5,30762312  | -0,534184372 | 0,000257973 | 0,038892967 |
| <b>Tnni1</b>         | 3,584368874 | 0,923998415  | 0,000288401 | 0,041954719 |
| <b>Rgs9</b>          | 8,038663943 | 0,44796957   | 0,000305048 | 0,043766787 |
| <b>Gm4737</b>        | 3,95653166  | -0,788699017 | 0,000316984 | 0,044843778 |
| <b>RP24-390L20.5</b> | 3,288289841 | -0,897992141 | 0,000322475 | 0,044940499 |
| <b>Gm10475</b>       | 4,581419909 | -0,77032687  | 0,000330416 | 0,045663486 |
| <b>Gm10143</b>       | 4,741120126 | -0,632053476 | 0,000337194 | 0,046151657 |
| <b>Ppp1r14a</b>      | 4,267036226 | 0,85165977   | 0,000351585 | 0,047403969 |
| <b>Depdc1b</b>       | 3,045036993 | 1,258004209  | 0,000362975 | 0,048156581 |
| <b>Bcas1</b>         | 10,9752945  | 0,446732673  | 0,000361205 | 0,048156581 |
| <b>Gm9887</b>        | 3,284525342 | -1,036015739 | 0,000379917 | 0,049574412 |
| <b>Slc6a20b</b>      | 3,805006358 | -0,896122701 | 0,000382629 | 0,049574412 |
| <b>Ube4bos3</b>      | 4,06282201  | -0,737740914 | 0,000377679 | 0,049574412 |



**Supplementary Table 2: Primers used for RT-qPCR**

| <b>Gene Name</b> | <b>Forward</b>       | <b>Reverse</b>       |
|------------------|----------------------|----------------------|
| <b>Arc</b>       | CTGAAGCAGCAGACCTGACA | CTCAGCAGCCTTGAGACCTG |
| <b>Plp1</b>      | GCAAAGTCAGCCGCAAACA  | GCCCCTACCAGACATCTAGC |
| <b>Mag</b>       | TTCTCAGGGGGAGACAACC  | ACTCTCCTGGGGCTCTCAGT |
| <b>Mog</b>       | CTGGCAGGACAGTTTCTTGA | AAAGAGGCCAATGGGAAATC |
| <b>Fos</b>       | TACTACCATTCCCCAGCCGA | GCTGTCACCGTGGGGATAAA |
| <b>Fosb</b>      | CTTCAACCAGCACAACCACC | TCTGCGAACCCTTCGCTTTT |
| <b>Gapdh</b>     | CTTCTTGTGCAGTGCCAGC  | GAGGTCAATGAAGGGGTCGT |
